# Supplementary material for: Bacillus subtilis biofilm matrix components target seed oil bodies to promote growth and anti-fungal resistance in melon
Source: PubMed Central journal article supplement (PMC9246715; doi:10.1038/s41564-022-01134-8), 2022-06-06
Supplement: 41564_2022_1134_MOESM1_ESM.pdf [file 41564_2022_1134_MOESM1_ESM.pdf]

## Supplementary information

---

# ***Bacillus subtilis* biofilm matrix components target seed oil bodies to promote growth and anti-fungal resistance in melon**

---

In the format provided by the authors and unedited

# **Bacillus subtilis biofilm matrix components target seed oil bodies to promote growth and anti-fungal resistance in melon**

Berlanga-Clavero *et al.*

## **Supplementary information**

Supplementary Tables S1 to S8

Supplementary references

Source Data Files - Figures 1 to 5

Image Source Data File - Figure 4

Source Data File - Extended Data Figure 1

Source Data File - Extended Data Figure 3

Source Data File - Extended Data Figure 4

Source Data File - Extended Data Figure 5

**Table S1.** Bacterial strains used in this study.

| Strain                       | Genotype                                                                                                                      | Reference                                  |
|------------------------------|-------------------------------------------------------------------------------------------------------------------------------|--------------------------------------------|
| <i>B. subtilis</i> NCIB 3610 | Wild type, undomesticated strain                                                                                              | Laboratory collection                      |
| $\Delta$ <i>tasA</i>         | <i>B. subtilis</i> NCIB 3610 <i>tasA::km</i>                                                                                  | Vlamakis et al., 2008 <sup>(1)</sup>       |
| JC81                         | <i>B. subtilis</i> NCIB 3610 ( <i>tapA-sipW-tasA</i> )::spc <i>lacA::(tapA-sipW-tasA<sub>K68A,D69A</sub>)</i>                 | Cámara-Almirón et al., 2020 <sup>(2)</sup> |
| $\Delta$ <i>tapA</i>         | <i>B. subtilis</i> NCIB 3610 ( <i>tapA-sipW-tasA</i> )::spc <i>amyE::(tapA<math>\Delta</math><sub>13-234</sub>-sipW-tasA)</i> | Chu et al., 2006 <sup>(3)</sup>            |
| $\Delta$ <i>bslA</i>         | <i>B. subtilis</i> NCIB 3610 <i>bslA::mIs</i>                                                                                 | Cámara-Almirón et al., 2020 <sup>(2)</sup> |
| $\Delta$ <i>eps</i>          | <i>B. subtilis</i> NCIB 3610 ( <i>epsA-O</i> )::tet                                                                           | Branda et al., 2006 <sup>(4)</sup>         |
| $\Delta$ <i>srf</i>          | <i>B. subtilis</i> NCIB 3610 <i>srfAA::mIs</i>                                                                                | Branda et al., 2001 <sup>(5)</sup>         |
| $\Delta$ <i>pps</i>          | <i>B. subtilis</i> NCIB 3610 <i>pps::Tn10(spc)</i>                                                                            | Tsuge et al, 1999 <sup>(6)</sup>           |
| $\Delta$ <i>pks</i>          | <i>B. subtilis</i> NCIB 3610 <i>pks::spc</i>                                                                                  | Straight et al., 2007 <sup>(7)</sup>       |

**Table S2.** Primers used in Gene expression analysis by qRT-PCR.

| Gene            | Primers pairs | Sequence (5'→3')      | Amplicon (bp) |
|-----------------|---------------|-----------------------|---------------|
| <i>ga20ox1</i>  | GA20ox1-F     | GCATAGAGCAGTGGTGAACA  | 96            |
|                 | GA20ox1-R     | AACTCCCTTGGTGGCTTTAC  |               |
| <i>cyp707a1</i> | CYP707A1-F    | GGCCATGAAAGCAAGGAAAG  | 104           |
|                 | CYP707A1-R    | CCATGAAAGATCCAAGGAGGT |               |
| <i>act7</i>     | ACT-F         | CACTGGTATTGTGCTGGATTC | 98            |
|                 | ACT7-R        | CAAGGTCCAAACGGAGAATG  |               |

**Table S3.** MZmine2.37 with IIN settings used for preprocessing steps of LC-MS/MS data acquired in positive ion mode using the GNPS environment.

| Process                                         |                                     | Settings for For Q-<br>Exactive data | Settings for For<br>QTOF data |
|-------------------------------------------------|-------------------------------------|--------------------------------------|-------------------------------|
| Mass detection                                  | MS1                                 | 3.00E+04                             | 2.0E+02                       |
|                                                 | MS2                                 | 5.00E+02                             | 0                             |
| ADAP<br>Chromatogram<br>building                | Min group size                      | 4                                    | 10                            |
|                                                 | Group intensity<br>threshold        | 1.70E+06                             | 2.0E+02                       |
|                                                 | Min highest<br>intensity            | 6.50E+04                             | 5.0E+02                       |
|                                                 | <i>m/z</i> tolerance                | 0.002                                | 0.002                         |
| Deconvolution<br>[Local minimum<br>search]      | Chromatographic<br>threshold (%)    | 83                                   | 90                            |
| <i>m/z</i> center<br>calculation:<br>AUTO       | Search minimum in<br>RT range (min) | 0.03                                 | 0.05                          |
| <i>m/z</i> range MS2<br>scan pairing:<br>0.01Da | Min relative height<br>(%)          | 1                                    | 1                             |
| RT range MS2<br>scan pairing:<br>0.15 min       | Minimum absolute<br>height          | 8.00E+04                             | 5.0E+02                       |
|                                                 | Min ratio of peak<br>top/edge       | 1                                    | 2                             |
|                                                 | Peak duration<br>range (min)        | 0.0 - 3.0                            | 0.03 – 3.0                    |
| Isotopic peak<br>grouper                        | <i>m/z</i> tolerance                | 0.0015                               | 0.002                         |
|                                                 | RT tolerance                        | 0.07 min                             | 0.1                           |
|                                                 | Max charge                          | 3                                    | 2                             |
| Alignment [Join<br>Aligner]                     | <i>m/z</i> tolerance                | 0.0015                               | 0.002                         |
|                                                 | Weight for <i>m/z</i>               | 2                                    | 20                            |
|                                                 | Weight for RT                       | 1                                    | 0.1                           |
|                                                 | RT tolerance                        | 0.35 min                             | 0.1 min                       |
| Duplicate peak<br>filter                        | <i>m/z</i> tolerance                | 0.001                                | 0.002                         |

|                                                 |                                            |                                            |                                            |
|-------------------------------------------------|--------------------------------------------|--------------------------------------------|--------------------------------------------|
| Filter Mode:NEW<br>AVERAGE                      | RT tolerance                               | 0.1 min                                    | 0.05 min                                   |
| Gap filling [Peak<br>finder<br>(multithreaded)] | Intensity tolerance                        | 5%                                         | 1%                                         |
|                                                 | <i>m/z</i> tolerance                       | 0.001                                      | 0.002                                      |
|                                                 | RT tolerance                               | 0.12 min                                   | 0.1 min                                    |
| Peak filter                                     | #Data points                               | 3.0-1.0E+04                                | 3.0-1.0E+04                                |
| Peak list rows<br>filter                        | Min peaks in a row                         | 5                                          | 5                                          |
|                                                 | Reset peak<br>number ID                    | Checked                                    | Checked                                    |
| metaCorrelate                                   | RT tolerance                               | 0.08                                       | 0.09                                       |
|                                                 | Min height                                 | 5.00E+04                                   | 4.0E+02                                    |
|                                                 | Noise level                                | 3.00E+04                                   | 2.0E+02                                    |
|                                                 | Min samples filter                         | Min samples in all<br>abs = 2 rel = 0      | Min samples in all<br>abs = 2 rel = 0      |
|                                                 |                                            | Min samples in<br>group abs = 0 rel =<br>0 | Min samples in<br>group abs = 0 rel =<br>0 |
|                                                 |                                            | Min %-intensity<br>overlap: 50             | Min %-intensity<br>overlap: 50             |
|                                                 |                                            | Exclude estimated<br>features (gap-filled) | Exclude estimated<br>features (gap-filled) |
|                                                 | Correlation<br>grouping (checked)          | Min data points: 5                         | Min data points: 5                         |
|                                                 |                                            | Min data points on<br>edge: 2              | Min data points on<br>edge: 2              |
|                                                 |                                            | Measure: Pearson                           | Measure: Pearson                           |
|                                                 |                                            | Min feature shape<br>correlation: 65.0%    | Min feature shape<br>correlation: 65.0%    |
|                                                 |                                            | Min total<br>correlation:<br>unchecked     | Min total<br>correlation:<br>unchecked     |
|                                                 | Feature height<br>correlation<br>(checked) | Min data points: 3                         | Min data points: 3                         |
|                                                 |                                            | Measure: Pearson                           | Measure: Pearson                           |
|                                                 |                                            | Min correlation:<br>65.0%                  | Min correlation:<br>65.0%                  |
| Ion identity<br>networking                      | <i>m/z</i> tolerance                       | 0.001                                      | 0.001                                      |
|                                                 | Check                                      | ONE FEATURE                                | ONE FEATURE                                |
|                                                 | Min height                                 | 1.00E+05                                   | 1.00E+05                                   |

|                                                   |                                    |                                                                                                              |                                                                                                              |         |
|---------------------------------------------------|------------------------------------|--------------------------------------------------------------------------------------------------------------|--------------------------------------------------------------------------------------------------------------|---------|
|                                                   | Annotation refinement (checked)    | Min size (checked):<br>2                                                                                     | Min size (checked):<br>2                                                                                     |         |
|                                                   |                                    | Delete small network without major                                                                           | Delete small network without major                                                                           |         |
|                                                   |                                    | Delete networks without monomer                                                                              | Delete networks without monomer                                                                              |         |
|                                                   | Ion identity library               | MS mode: POSITIVE                                                                                            | MS mode: POSITIVE                                                                                            |         |
|                                                   |                                    | Max charge: 2                                                                                                | Max charge: 2                                                                                                |         |
|                                                   |                                    | Max molecule/cluster: 2                                                                                      | Max molecule/cluster: 2                                                                                      |         |
|                                                   |                                    | Adducts: [M+H] <sup>+</sup> , [M+Na] <sup>+</sup> , [M+NH <sub>4</sub> ] <sup>+</sup> , [M+2H] <sup>2+</sup> | Adducts: [M+H] <sup>+</sup> , [M+Na] <sup>+</sup> , [M+NH <sub>4</sub> ] <sup>+</sup> , [M+2H] <sup>2+</sup> |         |
|                                                   |                                    | Modifications: [M-H <sub>2</sub> O], [M-2H <sub>2</sub> O]                                                   | Modifications: [M-H <sub>2</sub> O], [M-2H <sub>2</sub> O]                                                   |         |
|                                                   | Ion identity networking refinement | Min size (checked)                                                                                           | 2                                                                                                            | 2       |
|                                                   |                                    | Delete small network without major                                                                           | Checked                                                                                                      | Checked |
| Delete smaller networks: Link threshold (checked) |                                    | 3                                                                                                            | 3                                                                                                            |         |
| Delete networks without monomer                   |                                    | Checked                                                                                                      | Checked                                                                                                      |         |
| Add ion identities to networks                    | <i>m/z</i> tolerance               | 0                                                                                                            | 0                                                                                                            |         |
|                                                   | Min height                         | 8.00E+04                                                                                                     | 8.00E+04                                                                                                     |         |
|                                                   | Annotation refinement (checked)    | Delete small networks without major (checked)                                                                | Delete small networks without major (checked)                                                                |         |
|                                                   |                                    | Delete smaller networks: Link threshold (checked): 3                                                         | Delete smaller networks: Link threshold (checked): 3                                                         |         |
|                                                   |                                    | Delete networks without monomer                                                                              | Delete networks without monomer                                                                              |         |
|                                                   | Ion identity library               | MS mode: POSITIVE                                                                                            | MS mode: POSITIVE                                                                                            |         |
|                                                   |                                    | Max charge: 2                                                                                                | Max charge: 2                                                                                                |         |

|                                   |                                                |                                                                                                                                                                                       |                                                                                                                                                                                       |
|-----------------------------------|------------------------------------------------|---------------------------------------------------------------------------------------------------------------------------------------------------------------------------------------|---------------------------------------------------------------------------------------------------------------------------------------------------------------------------------------|
|                                   |                                                | Max molecules/cluster: 3                                                                                                                                                              | Max molecules/cluster: 3                                                                                                                                                              |
|                                   |                                                | Adducts: [M+H] <sup>+</sup> , [M+Na] <sup>+</sup> , [M+K] <sup>+</sup> , [M+NH <sub>4</sub> ] <sup>+</sup> , [M+2H] <sup>2+</sup> , [M+H+Na] <sup>2+</sup> , [M-H+2Na] <sup>+</sup> , | Adducts: [M+H] <sup>+</sup> , [M+Na] <sup>+</sup> , [M+K] <sup>+</sup> , [M+NH <sub>4</sub> ] <sup>+</sup> , [M+2H] <sup>2+</sup> , [M+H+Na] <sup>2+</sup> , [M-H+2Na] <sup>+</sup> , |
|                                   |                                                | Modifications: [M-H <sub>2</sub> O], [M-2H <sub>2</sub> O], [M-CO], [M-CO <sub>2</sub> ], [M+HAc], [M+ACN]                                                                            | Modifications: [M-H <sub>2</sub> O], [M-2H <sub>2</sub> O], [M-CO], [M-CO <sub>2</sub> ], [M+HAc], [M+ACN]                                                                            |
| Check all ion identities by MS/MS | <i>m/z</i> tolerance (MS <sub>2</sub> )        | 0.0015                                                                                                                                                                                | 0.0015                                                                                                                                                                                |
|                                   | Min height in MS <sub>2</sub>                  | 1.00E+03                                                                                                                                                                              | 1.00E+03                                                                                                                                                                              |
|                                   | Check for multimers                            | Checked                                                                                                                                                                               | Checked                                                                                                                                                                               |
|                                   | Check neutral losses (MS->MS <sub>2</sub> )    | Checked, PRECURSOR                                                                                                                                                                    | Checked, PRECURSOR                                                                                                                                                                    |
| Export for/Submit to GNPS         | Merge MS/MS                                    | Select spectra to merge: same sample                                                                                                                                                  | Select spectra to merge: same sample                                                                                                                                                  |
|                                   | Filter only with MS <sub>2</sub> or annotation | <i>m/z</i> merge mode: weighted average (remove outliers)                                                                                                                             | <i>m/z</i> merge mode: weighted average (remove outliers)                                                                                                                             |
|                                   |                                                | Intensity merge mode: sum intensities                                                                                                                                                 | Intensity merge mode: sum intensities                                                                                                                                                 |
|                                   |                                                | Expected mass deviation: 0.001                                                                                                                                                        | Expected mass deviation: 0.001                                                                                                                                                        |
|                                   |                                                | Cosine threshold: 70.0%                                                                                                                                                               | Cosine threshold: 70.0%                                                                                                                                                               |
|                                   |                                                | Peak count threshold: 20.0%                                                                                                                                                           | Peak count threshold: 20.0%                                                                                                                                                           |
|                                   |                                                | Isolation window offset: 0                                                                                                                                                            | Isolation window offset: 0                                                                                                                                                            |
|                                   |                                                | Isolation window width: 1.5                                                                                                                                                           | Isolation window width: 1.5                                                                                                                                                           |
| Export for SIRIUS                 | Merge MS/MS                                    | Select spectra to merge: same sample                                                                                                                                                  | Select spectra to merge: same sample                                                                                                                                                  |

|  |                                                                 |                                                                 |
|--|-----------------------------------------------------------------|-----------------------------------------------------------------|
|  | <i>m/z</i> merge mode:<br>weighted average<br>(remove outliers) | <i>m/z</i> merge mode:<br>weighted average<br>(remove outliers) |
|  | Intensity merge<br>mode: sum<br>intensities                     | Intensity merge<br>mode: sum<br>intensities                     |
|  | Expected mass<br>deviation: 0.001                               | Expected mass<br>deviation: 0.001                               |
|  | Cosine threshold:<br>70.0%                                      | Cosine threshold:<br>70.0%                                      |
|  | Peak count<br>threshold: 20.0%                                  | Peak count<br>threshold: 20.0%                                  |
|  | Isolation window<br>offset: 0                                   | Isolation window<br>offset: 0                                   |
|  | Isolation window<br>width: 1.5                                  | Isolation window<br>width: 1.5                                  |
|  | <i>m/z</i> tolerance                                            | 0.001                                                           |
|  | Exclude empty<br>MS/MS spectra                                  | Checked                                                         |
|  | Exclude multiple<br>charge                                      | Checked                                                         |
|  | Exclude multimers                                               | Checked                                                         |



**Table S4.** Settings used for FBMN using the GNPS environment.

| <b>Molecular networking</b>        |                                                                        |
|------------------------------------|------------------------------------------------------------------------|
| Data filtering                     | Removing all MS/MS fragment ions within +/- 17 Da of the precursor m/z |
| Window filter                      | Top 6 fragment ions in the +/- 50 Da window throughout the spectrum    |
| precursor ion mass tolerance       | 0.02 Da                                                                |
| MS/MS fragment ion tolerance       | 0.02 Da                                                                |
| cosine score                       | 0.7                                                                    |
| Minimum matched peaks              | 6                                                                      |
| maximum size of a molecular family | 100                                                                    |
| <b>Library search</b>              |                                                                        |
| Score Threshold                    | 0.6                                                                    |
| Minimum matched peaks              | 5                                                                      |

**Table S5.** HPLC-ESI-MS/MS analysis of co-eluting bands obtained in the pull-down assay between TasA and a seed protein extract.

| <b>Protein FDR</b> | <b>Accession</b> | <b>Description</b> | <b>q-value</b> | <b>PEP Score</b> | <b>Coverage [%]</b> | <b># AAs</b> | <b>MW [kDa]</b> |
|--------------------|------------------|--------------------|----------------|------------------|---------------------|--------------|-----------------|
| High               | A0A1S3C9Y1       | Oleosin            | 0              | 65.897           | 35                  | 182          | 19.5            |
| High               | A0A1S3B8E2       | Oleosin            | 0              | 35.099           | 18                  | 176          | 19              |
| High               | A0A1S3BXD3       | Oleosin            | 0              | 30.473           | 20                  | 142          | 15              |

**Table S6.** Average RPKM (reads per kilobase per million) counts of a selection of induced genes in leaves of plants from fengycin-treated seeds 0 hours (before the challenge with *B. cinerea* and 48 hours after the challenge.

| ID           | Description                                                      | Control |      | Fengycin |       |
|--------------|------------------------------------------------------------------|---------|------|----------|-------|
|              |                                                                  | 0h      | 48h  | 0h       | 48h   |
| MELO3C014485 | sugar transport protein 13                                       | 96      | 1075 | 3256     | 3473  |
| MELO3C003015 | Allene oxide cyclase                                             | 133     | 2845 | 36985    | 83705 |
| MELO3C004455 | blue copper protein-like                                         | 7       | 219  | 328      | 753   |
| MELO3C014620 | Glycosyltransferase                                              | 16      | 333  | 979      | 1486  |
| MELO3C017499 | 1-deoxy-D-xylulose-5-phosphate synthase                          | 211     | 1473 | 7668     | 6421  |
| MELO3C029299 | 12-oxophytodienoate reductase family protein                     | 1189    | 3653 | 11733    | 12813 |
| MELO3C009160 | trihelix transcription factor GT-3b                              | 20      | 268  | 802      | 2148  |
| MELO3C014239 | Aquaporin PIP2                                                   | 135     | 668  | 3371     | 4829  |
| MELO3C002598 | E3 ubiquitin-protein ligase RMA1H1-like                          | 339     | 1583 | 7543     | 7192  |
| MELO3C018463 | CBS domain-containing protein CBSX1, chloroplastic               | 14      | 155  | 3006     | 5753  |
| MELO3C026019 | Abscisic acid receptor                                           | 703     | 1707 | 1405     | 839   |
| MELO3C022678 | Protein TIFY 10B                                                 | 200     | 732  | 6514     | 8195  |
| MELO3C015780 | Calcium-transporting ATPase                                      | 64      | 314  | 2606     | 4396  |
| MELO3C007431 | alkaline ceramidase 3                                            | 724     | 3396 | 1125     | 1705  |
| MELO3C012630 | cysteine-rich and transmembrane domain-containing protein A-like | 120     | 395  | 2956     | 4144  |
| MELO3C017151 | protein NRT1/ PTR FAMILY 2.11-like                               | 721     | 2961 | 13668    | 22129 |
| MELO3C003567 | Glycosyltransferase                                              | 1072    | 2497 | 14918    | 21020 |
| MELO3C015514 | 12-oxophytodienoate reductase 3                                  | 116     | 346  | 1814     | 1705  |
| MELO3C024499 | Threonine dehydratase                                            | 328     | 2309 | 25591    | 30235 |
| MELO3C013916 | ethylene-responsive transcription factor 2                       | 668     | 1516 | 10405    | 5418  |
| MELO3C015881 | Ankyrin repeat protein                                           | 147     | 477  | 2235     | 2178  |
| MELO3C023587 | Protein BPS1 chloroplastic                                       | 130     | 382  | 2255     | 2940  |
| MELO3C009170 | vacuolar cation/proton exchanger 3-like                          | 1044    | 2172 | 1156     | 1398  |
| MELO3C010910 | Allene oxide synthase                                            | 3990    | 8544 | 19333    | 31388 |
| MELO3C014304 | chlorophyllase-1-like                                            | 42      | 165  | 10351    | 13675 |
| MELO3C008331 | ethylene-responsive transcription factor ERF113-like             | 612     | 1255 | 4202     | 5603  |

**Table S7.** Seed species tested for growth promotion activity after treatment with fengycin.

| Plant species               | Family               | Structure                                                              | Growth promotion activity |
|-----------------------------|----------------------|------------------------------------------------------------------------|---------------------------|
| <i>Arabidopsis thaliana</i> | <i>Brassicaceae</i>  | Embryo surrounded by a single cell layer of endosperm                  | No                        |
| <i>Solanum lycopersicum</i> | <i>Solanaceae</i>    | Embryo surrounded by abundant endosperm                                | No                        |
| <i>Cucumis sativus</i>      | <i>Cucurbitaceae</i> | Embryo surrounded by a perisperm/endosperm envelope                    | Small tendence            |
| <i>Cucumis melo</i>         | <i>Cucurbitaceae</i> |                                                                        | Yes                       |
| <i>Cucurbita pepo</i>       | <i>Cucurbitaceae</i> |                                                                        | No                        |
| <i>Glycine max</i>          | <i>Fabaceae</i>      | Non endospermic seed, embryo enclosed by the seed coat                 | Yes                       |
| <i>Zea mays</i>             | <i>Poaceae</i>       | Apical embryo and a starchy endosperm surrounded by the aleurone layer | No                        |
| <i>Tritium spp</i>          | <i>Poaceae</i>       |                                                                        | No                        |

Images adapted from Leubner G (2021). The Seed Biology Place - <http://www.seedbiology.eu>

**Table S8.** Named features along the manuscript and their parameters for being identified within the Sumner et al., 2007 framework.

| <b>Proposed Compound Name</b>  | <b>IonMode</b> | <b>Adduct</b> | <b>observed m/z</b> | <b>calculated m/z</b> | <b>ppm error</b> | <b>Mass Diff. m/z</b> | <b>Level of identification</b> |
|--------------------------------|----------------|---------------|---------------------|-----------------------|------------------|-----------------------|--------------------------------|
| POPC                           | Positive       | M+H           | 760.5822            | 760.586               | 4.97535          |                       | 2                              |
| Analog to TAG (18:1/18:2/18:2) | Positive       | M+NH4         | 898.76              | 880.75                |                  | -18.01                | 3                              |
| PC (0:0/16:0)                  | Positive       | M+H           | 522.3553            | 495.332               | 2.45377          |                       | 2                              |
| L-Tryptophan                   | Positive       | M+H-NH3       | 188.0709            | 188.0709              | 4.78688          |                       | 2                              |
| Glutathione, oxidized          | Positive       | M+H           | 613.1589            | 613.151               | 12.8411          |                       | 2                              |
| Dilinolenin (9c,12c,15c)       | Positive       | M+H-H2O       | 595.4672            | 595.4672              | 9.73737          |                       | 2                              |
| 3,4-Dihydroxycinnamic acid     | Positive       | [M+H]         | 181.0497            | 181.0497              | 1.68559          |                       | 2                              |
| Monolinolenin (9c,12c,15c)     | Positive       | M+H-H2O       | 335.256             | 335.256               | 5.91676          |                       | 2                              |
| Analog to Mangiferin           | Positive       | M+H           | 433.1132            | 423.09                |                  | -10.0232              | 3                              |
| Analog to 2-O-Rhamnosylvitexin | Positive       | M+H           | 595.1657            | 579.171               |                  | -15.9947              | 3                              |
| Analog to TAG (16:0/18:1/18:2) | Positive       | M+NH4         | 790.65              | 874.78                |                  | 84.13                 | 3                              |
| Analog to TAG (17:1/18:1/18:2) | Positive       | M+NH4         | 914.78              | 886.78                |                  | -28                   | 3                              |
| L-glutathione, reduced         | Positive       | M+H           | 308.09              | 308.09                | 5                |                       | 2                              |
| 16:0 Lyso PE                   | Positive       | M+H           | 496.34              | 496.34                | 8                |                       | 2                              |

## Supplementary references

1. Vlamakis, H., Aguilar, C., Losick, R. & Kolter, R. Control of cell fate by the formation of an architecturally complex bacterial community. *Genes Dev.* **22**, 945–953 (2008).
2. Cámara-Almirón, J. *et al.* Dual functionality of the amyloid protein TasA in *Bacillus* physiology and fitness on the phylloplane. *Nat. Commun.* **11**, 1–21 (2020).
3. Chu, F., Kearns, D. B., Branda, S. S., Kolter, R. & Losick, R. Targets of the master regulator of biofilm formation in *Bacillus subtilis*. *Mol. Microbiol.* **59**, 1216–1228 (2006).
4. Branda, S. S., Chu, F., Kearns, D. B., Losick, R. & Kolter, R. A major protein component of the *Bacillus subtilis* biofilm matrix. *Mol. Microbiol.* **59**, 1229–1238 (2006).
5. Branda, S. S., González-Pastor, J. E., Ben-Yehuda, S., Losick, R. & Kolter, R. Fruiting body formation by *Bacillus subtilis*. *Proc. Natl. Acad. Sci. U. S. A.* **98**, 11621–6 (2001).
6. Tsuge, K., Ano, T., Hirai, M., Nakamura, Y. & Shoda, M. The genes *degQ*, *pps*, and *lpa-8* (*sfp*) are responsible for conversion of *Bacillus subtilis* 168 to plipastatin production. *Antimicrob. Agents Chemother.* **43**, 2183–92 (1999).
7. Straight, P. D., Fischbach, M. A., Walsh, C. T., Rudner, D. Z. & Kolter, R. A singular enzymatic megacomplex from *Bacillus subtilis*. *Proc. Natl. Acad. Sci. U. S. A.* **104**, 305–10 (2007).
