# Supplementary material for: Bacillus subtilis biofilm matrix components target seed oil bodies to promote growth and anti-fungal resistance in melon
Source: PubMed Central journal article supplement (PMC9246715; doi:10.1038/s41564-022-01134-8), 2022-06-06

### Source Data File Figure 4

**Pull down assay.** SDS-PAGE Protein gel, Commasie Brilliant Blue staining (FT: Flow trough, W: wash, E: elution). Units of the molecular weight marker are kDa.

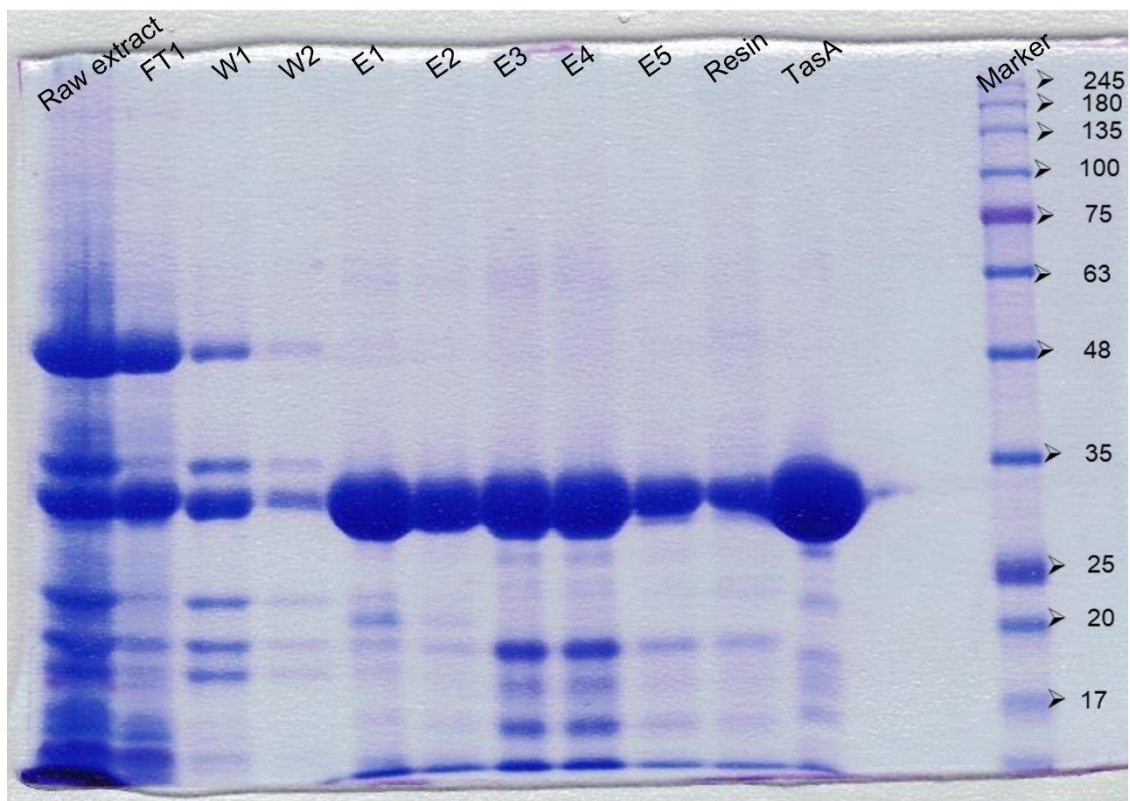

**Pull down assay.** SDS-PAGE Protein gel, Commasie Brilliant Blue staining. Negative control: no TasA added to the resin.

(FT: Flow trough, W: wash, E: elution). Units of the molecular weight marker are kDa.

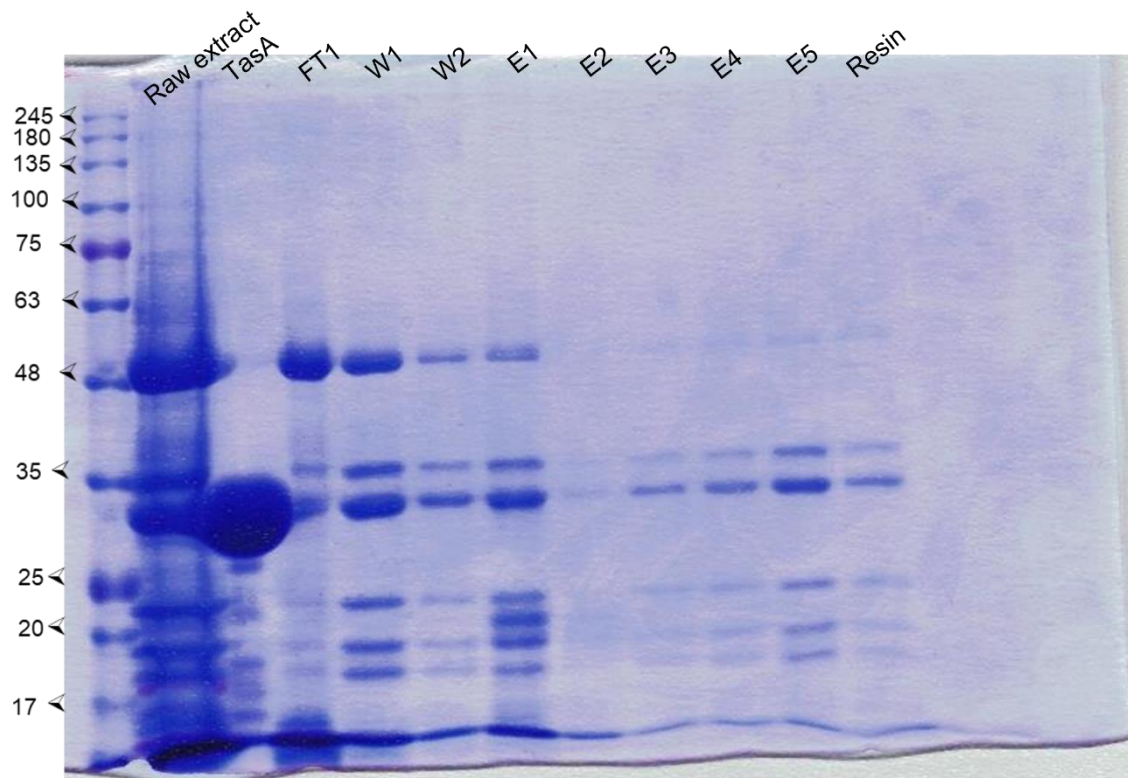

**Far Western Blot assay.** SDS-PAGE Protein gel, Commasie Brilliant Blue staining. Units of the molecular weight marker are kDa.

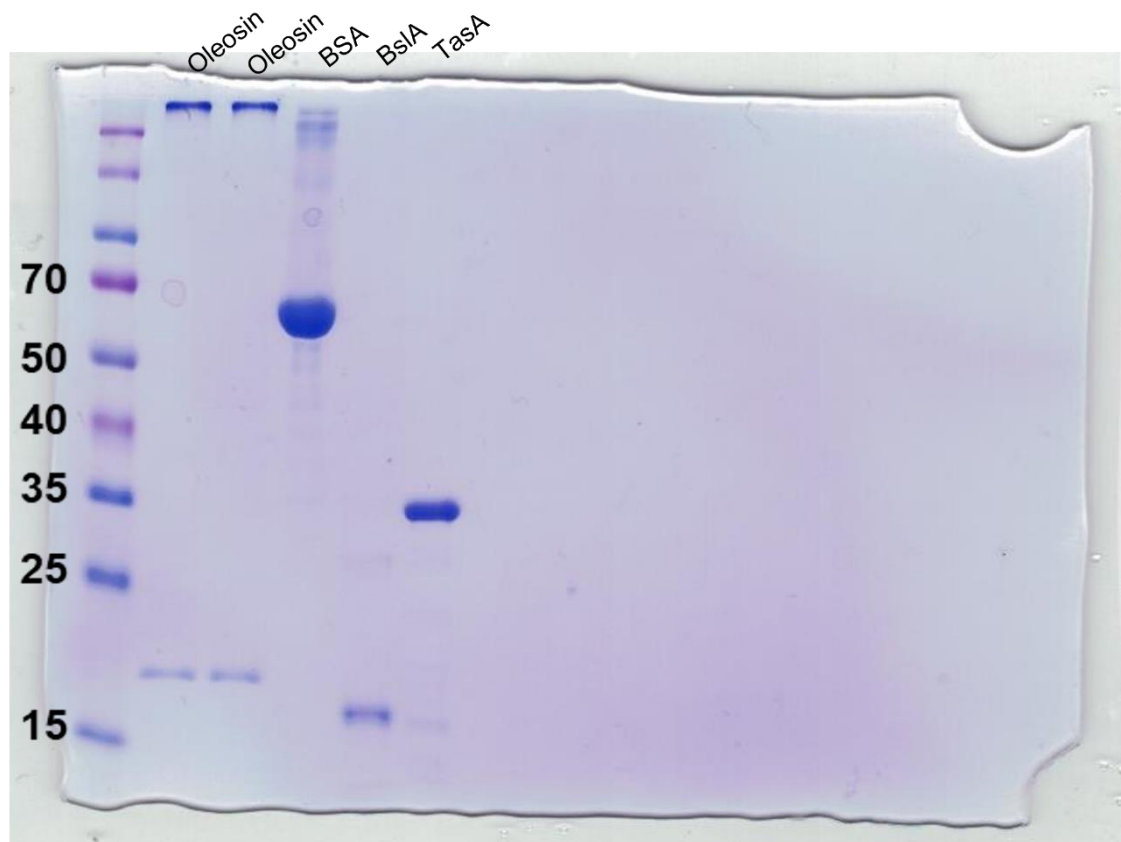

**Far Western Blot assay.** SDS-PAGE Protein gel transferred to PVDF membrane.  
Western Blot using an anti-TasA antibody (1:20.000).

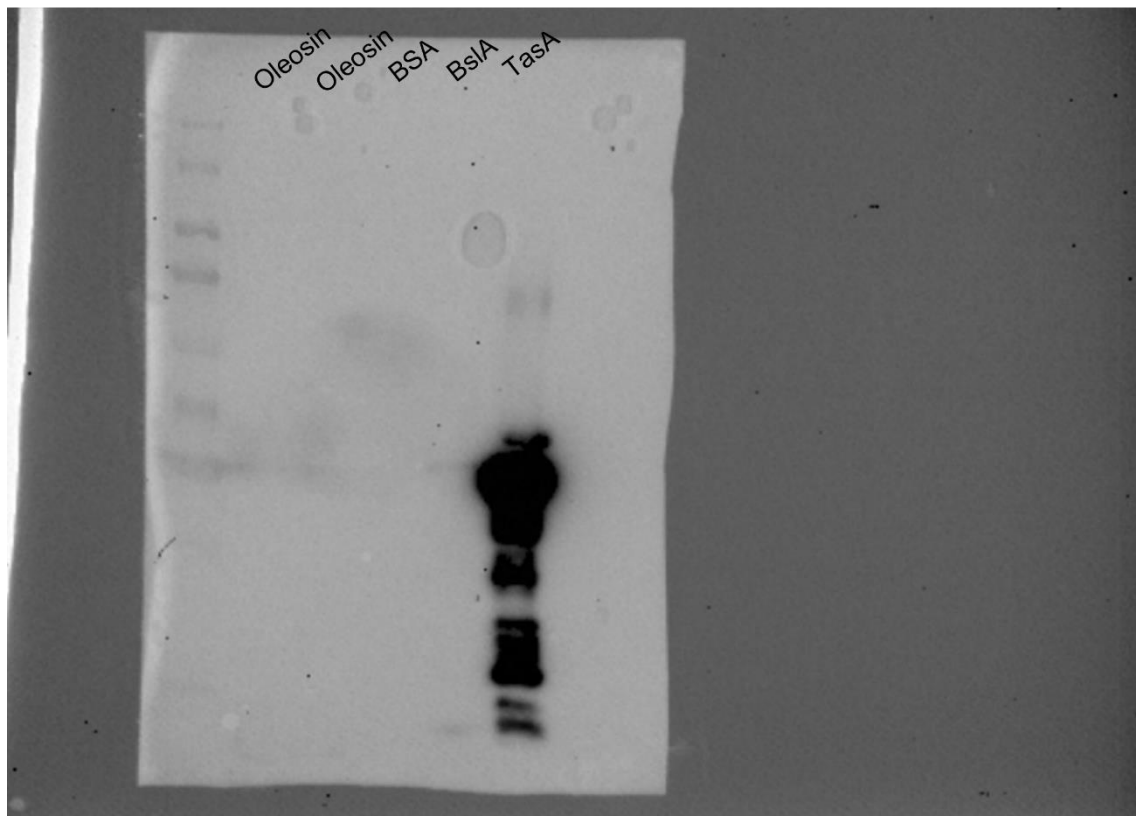

**Far Western Blot assay.** SDS-PAGE Protein gel transferred to PVDF membrane. Western Blot using an anti-TasA antibody (1:20.000) after renaturing of the proteins and membrane incubation with TasA as a bait protein.

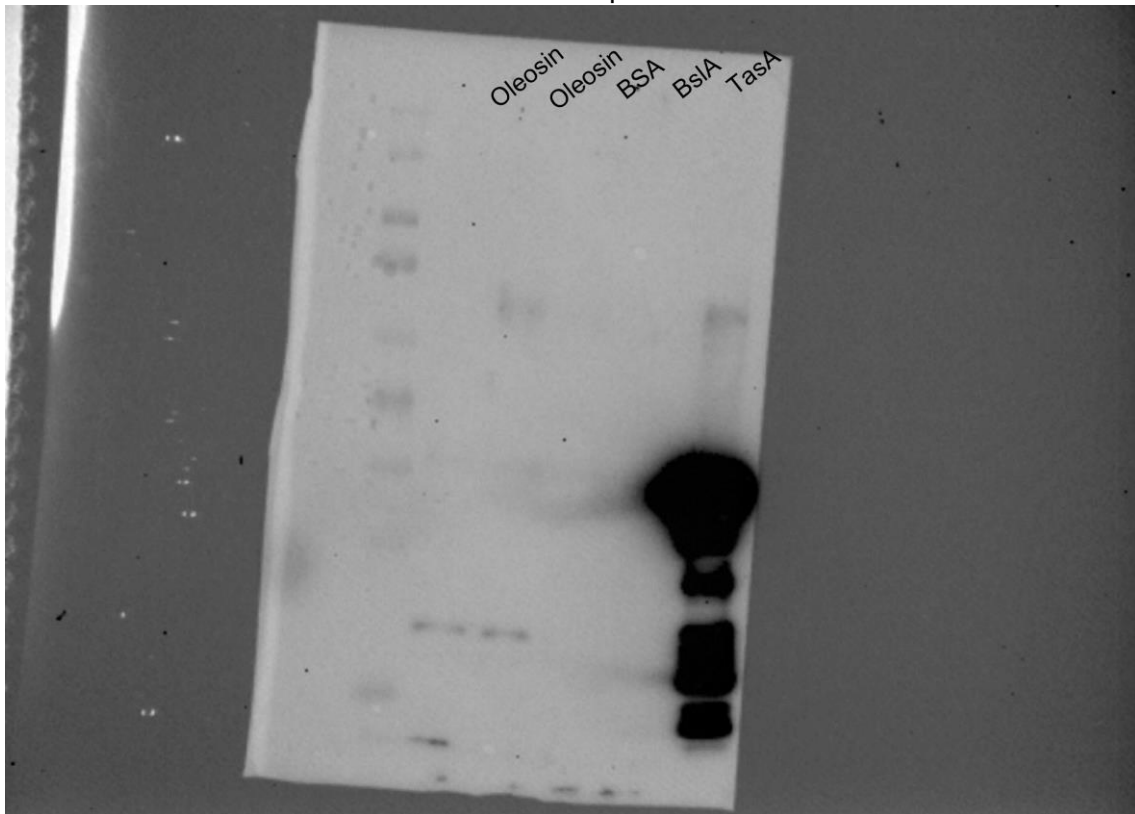

Supplement: 41564_2022_1134_MOESM8_ESM.pdf [file 41564_2022_1134_MOESM8_ESM.pdf]
